# Supplementary material
Source: Springer Nature journal article supplement (https://www.springermedizin.de/resource/supplementary/12931_2013_1592_MOESM3_ESM.pdf/10243336)

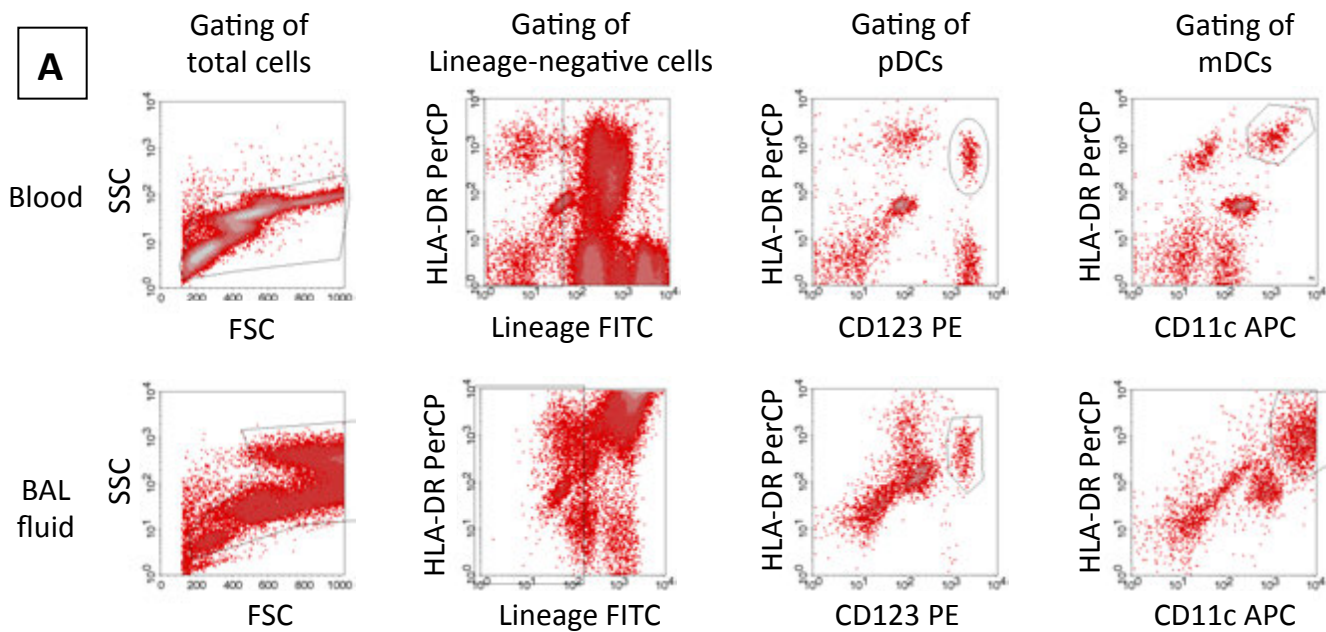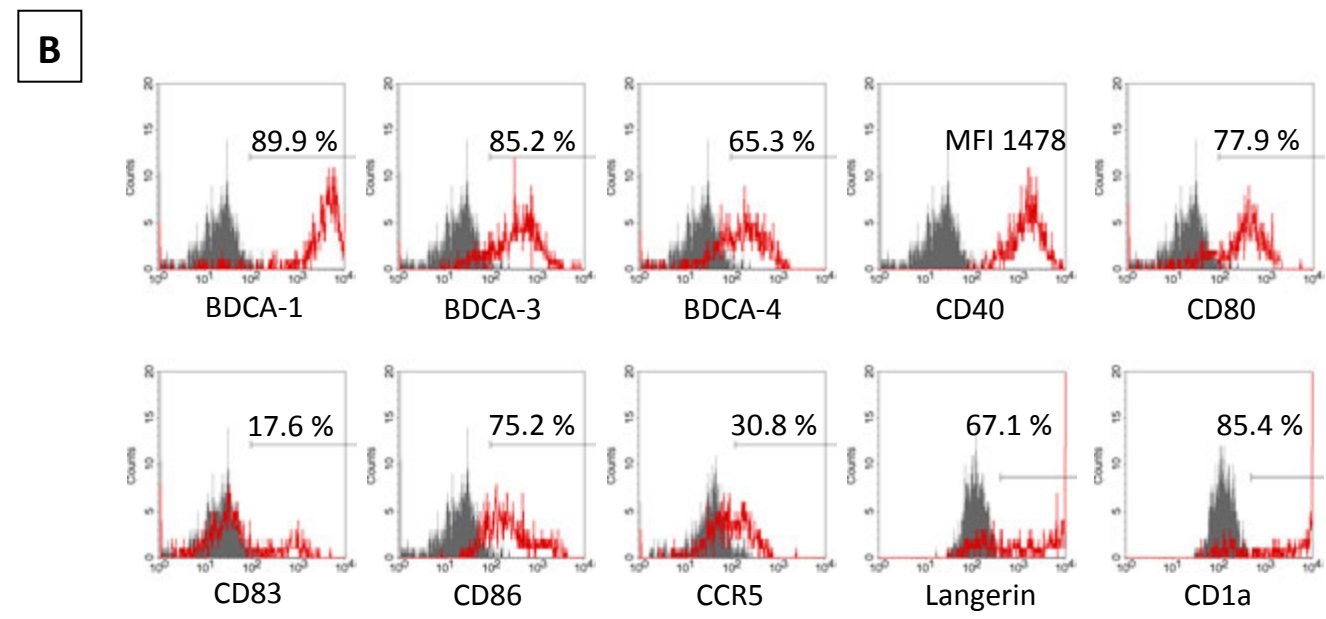

Supplement: MOESM3 [file 10243336]
